# Supplementary material for: Cryptic and extensive hybridization between ancient lineages of American crows
Source: bioRxiv or medRxiv preprint supplement (doi:10.1101/491654), 2018-12-10

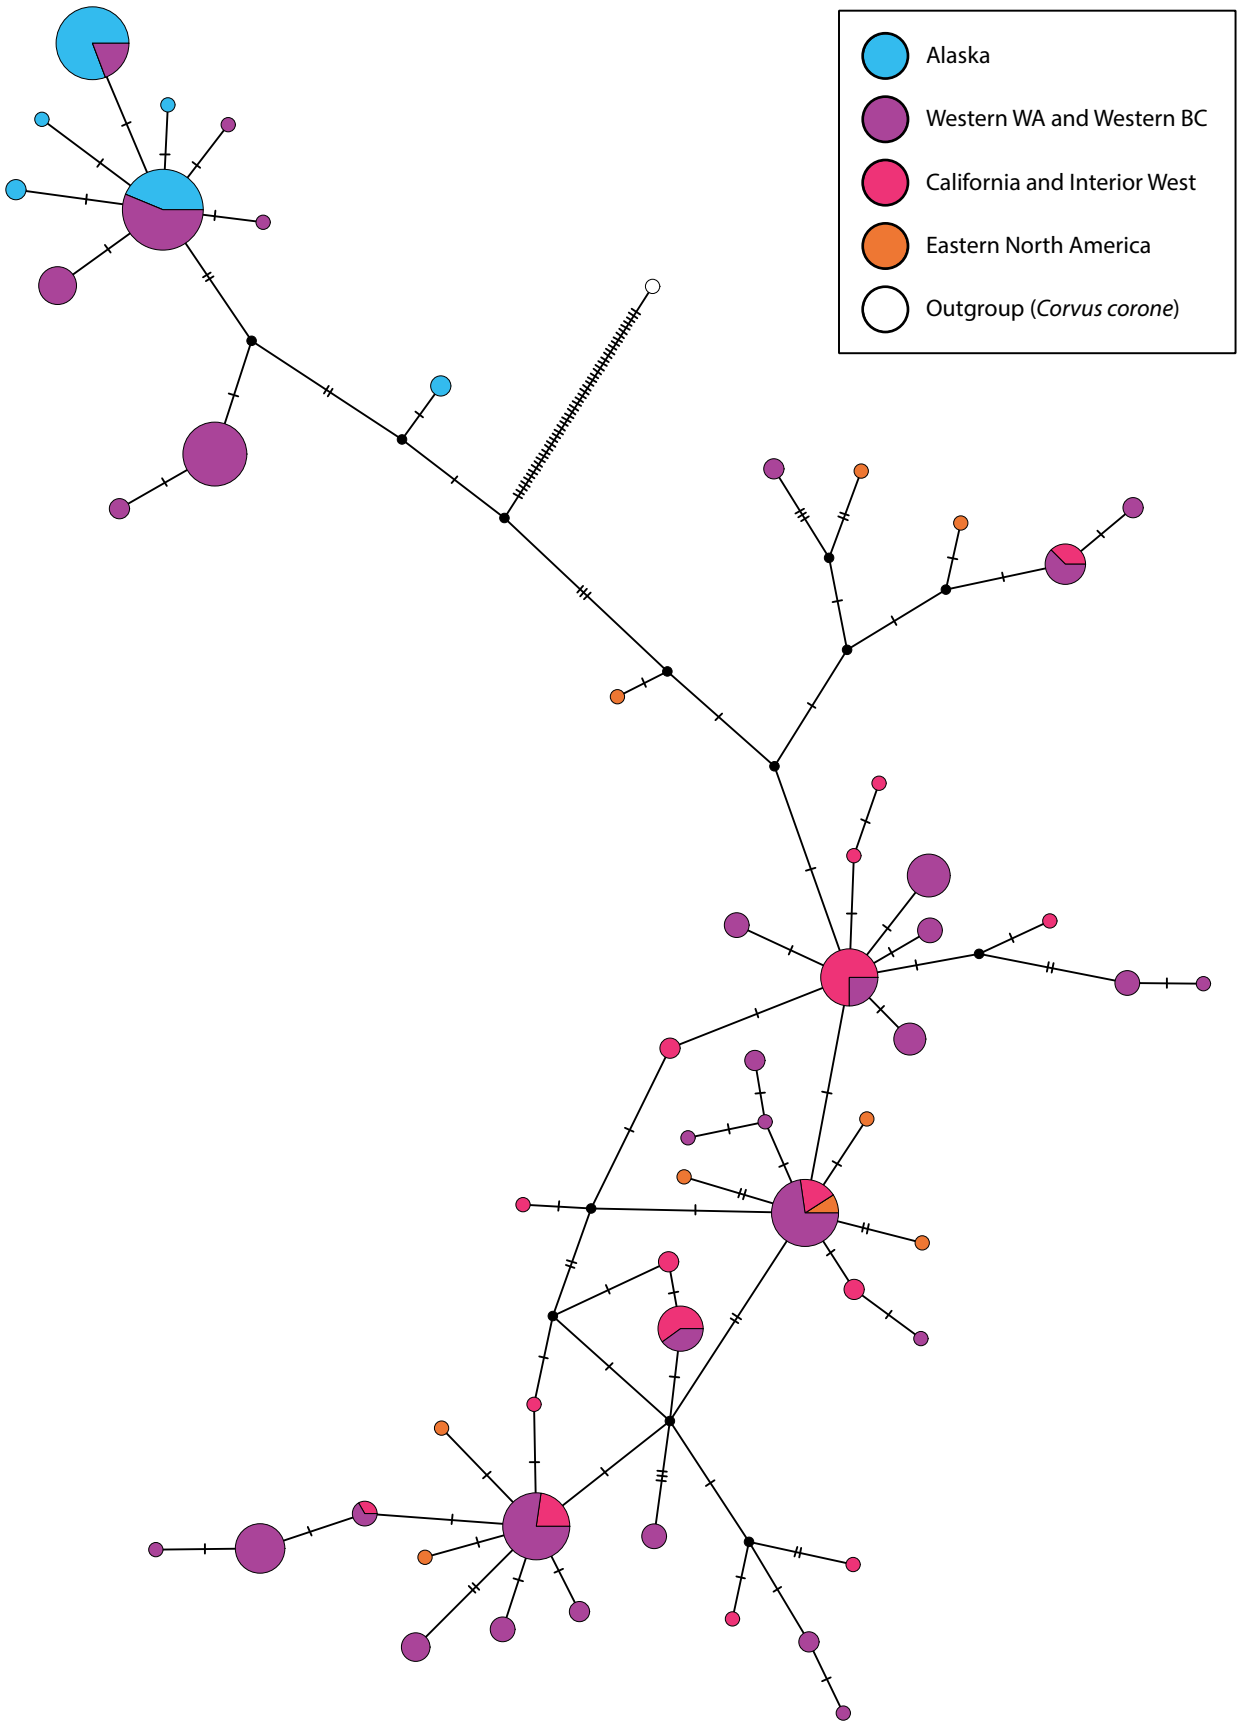

Supplement: Supplementary file [file media-2.pdf]
